# Supplementary material
Source: ML conference proceedings conference paper supplement (https://proceedings.neurips.cc/paper_files/paper/2013/hash/eb6fdc36b281b7d5eabf33396c2683a2-Abstract.html)

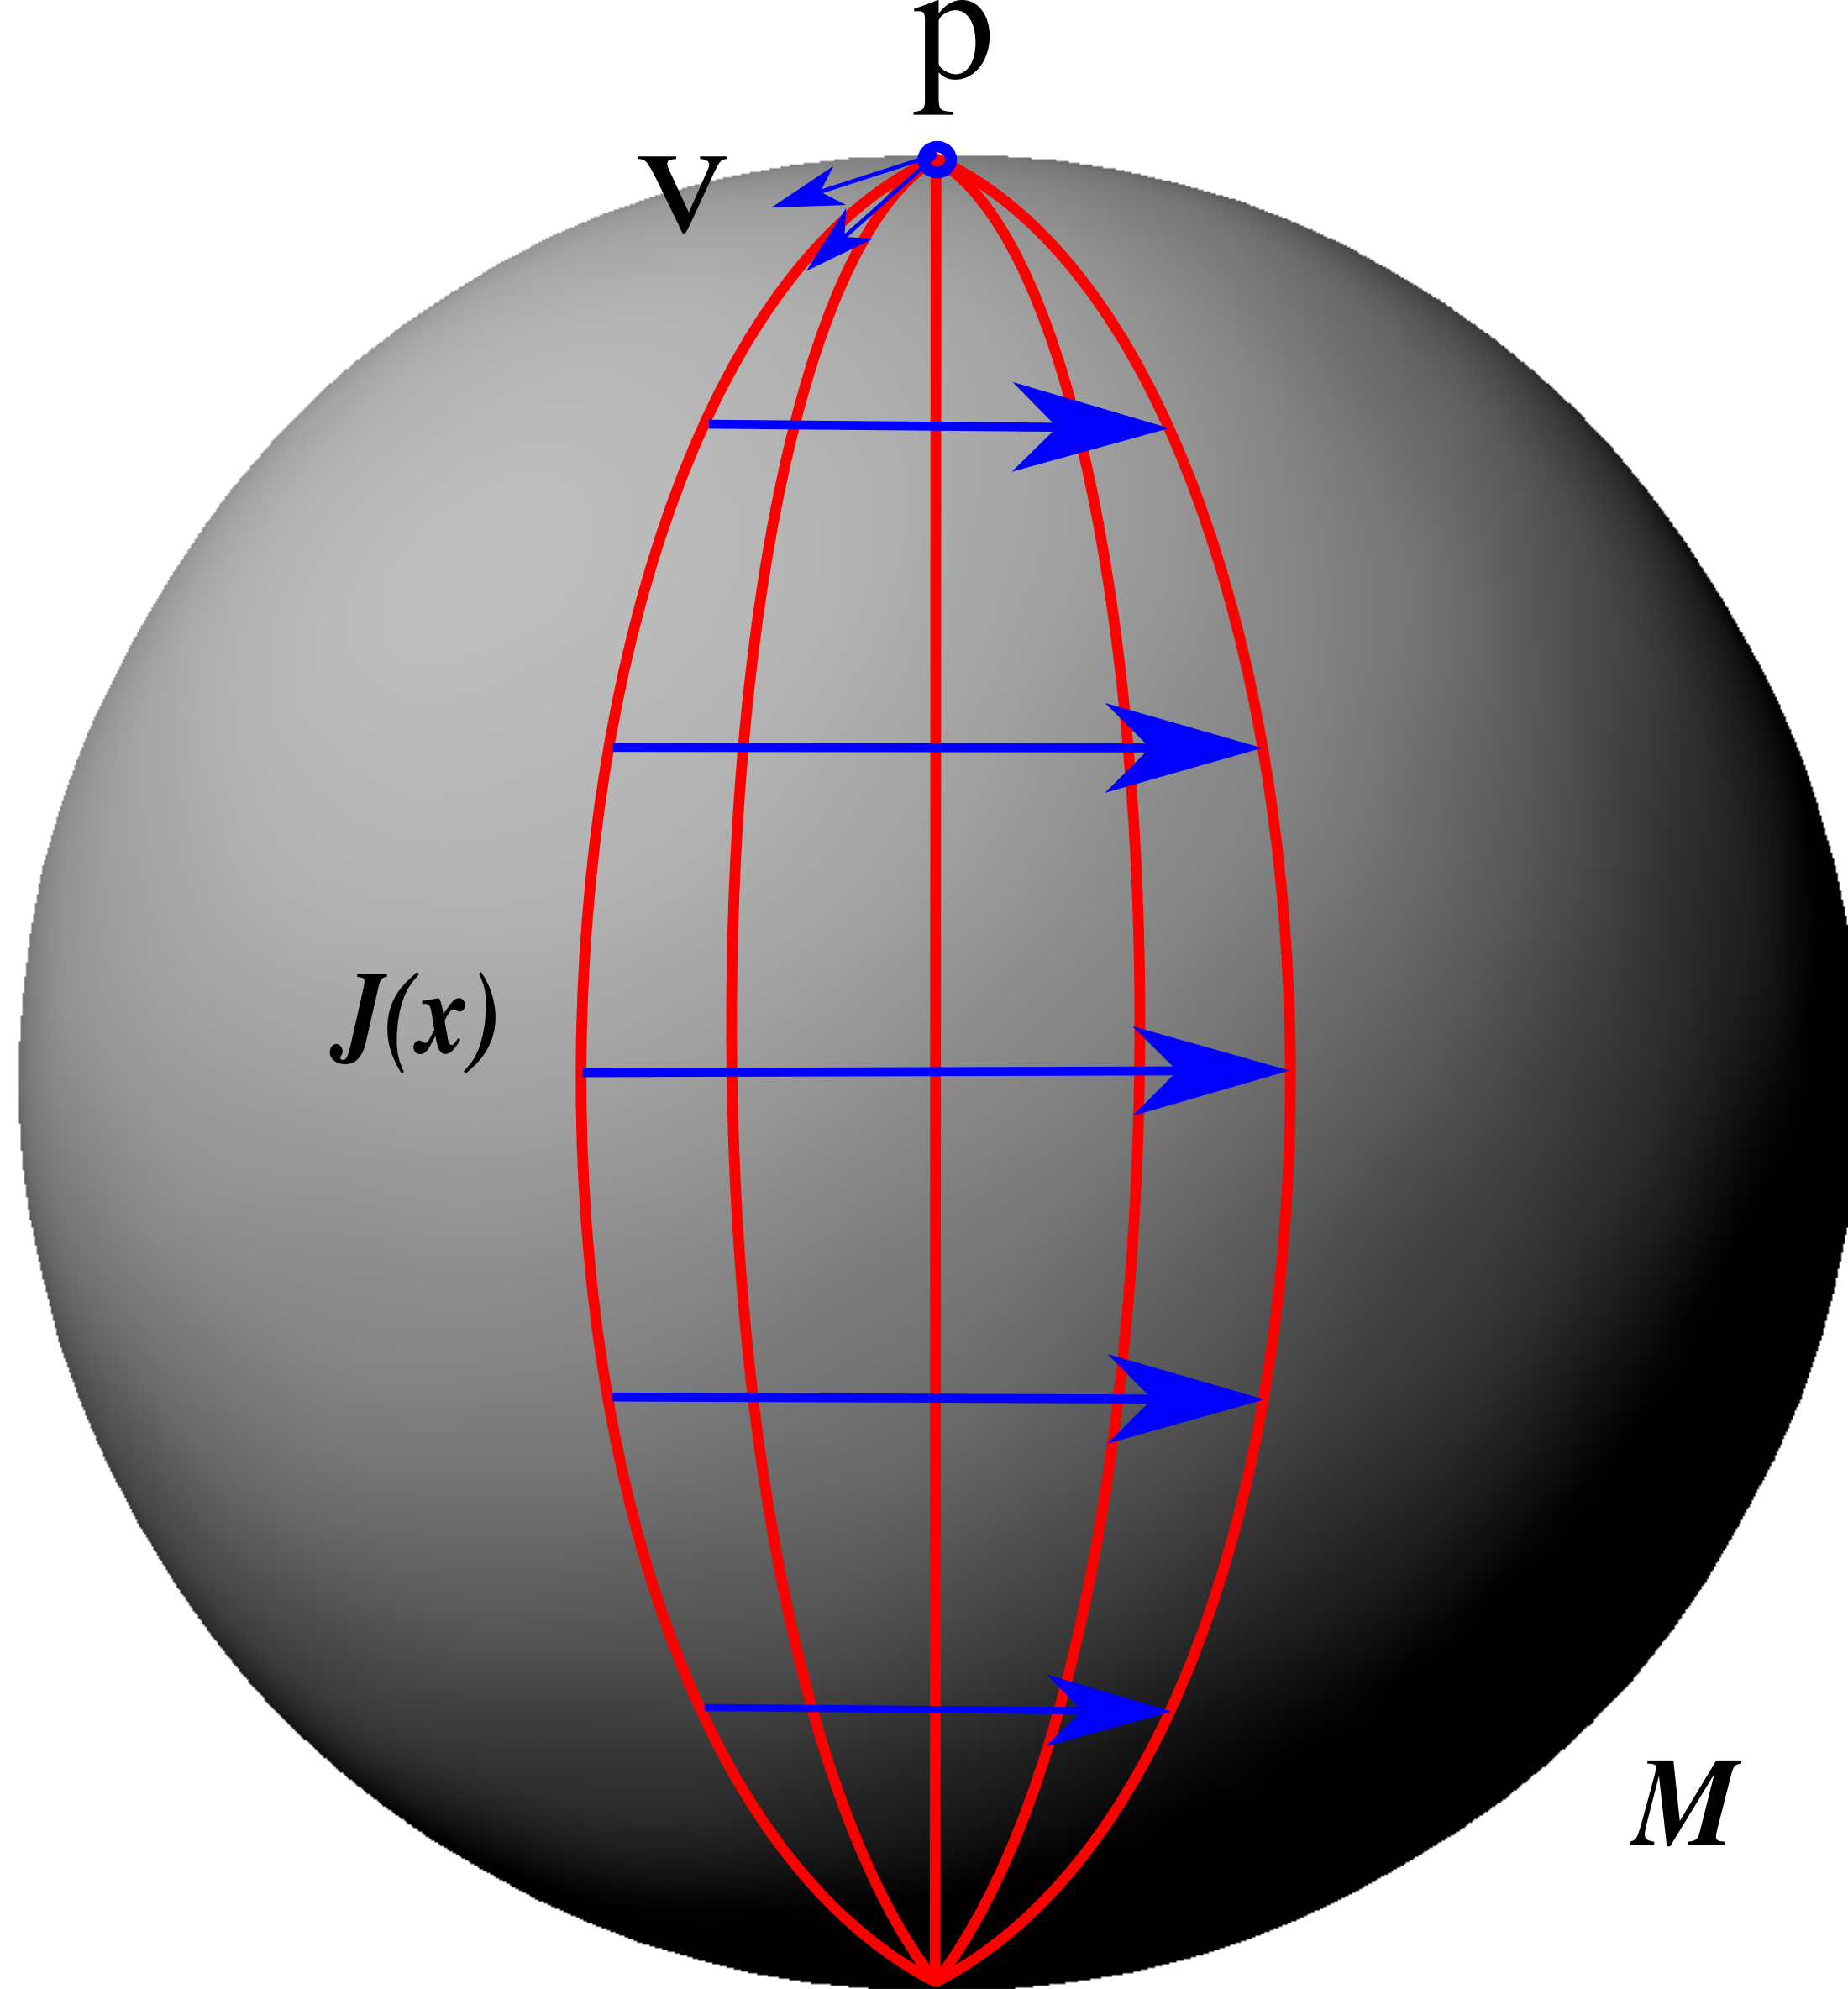

Supplement: Supplementary file 1 [file eb6fdc36b281b7d5eabf33396c2683a2-Supplemental.zip]

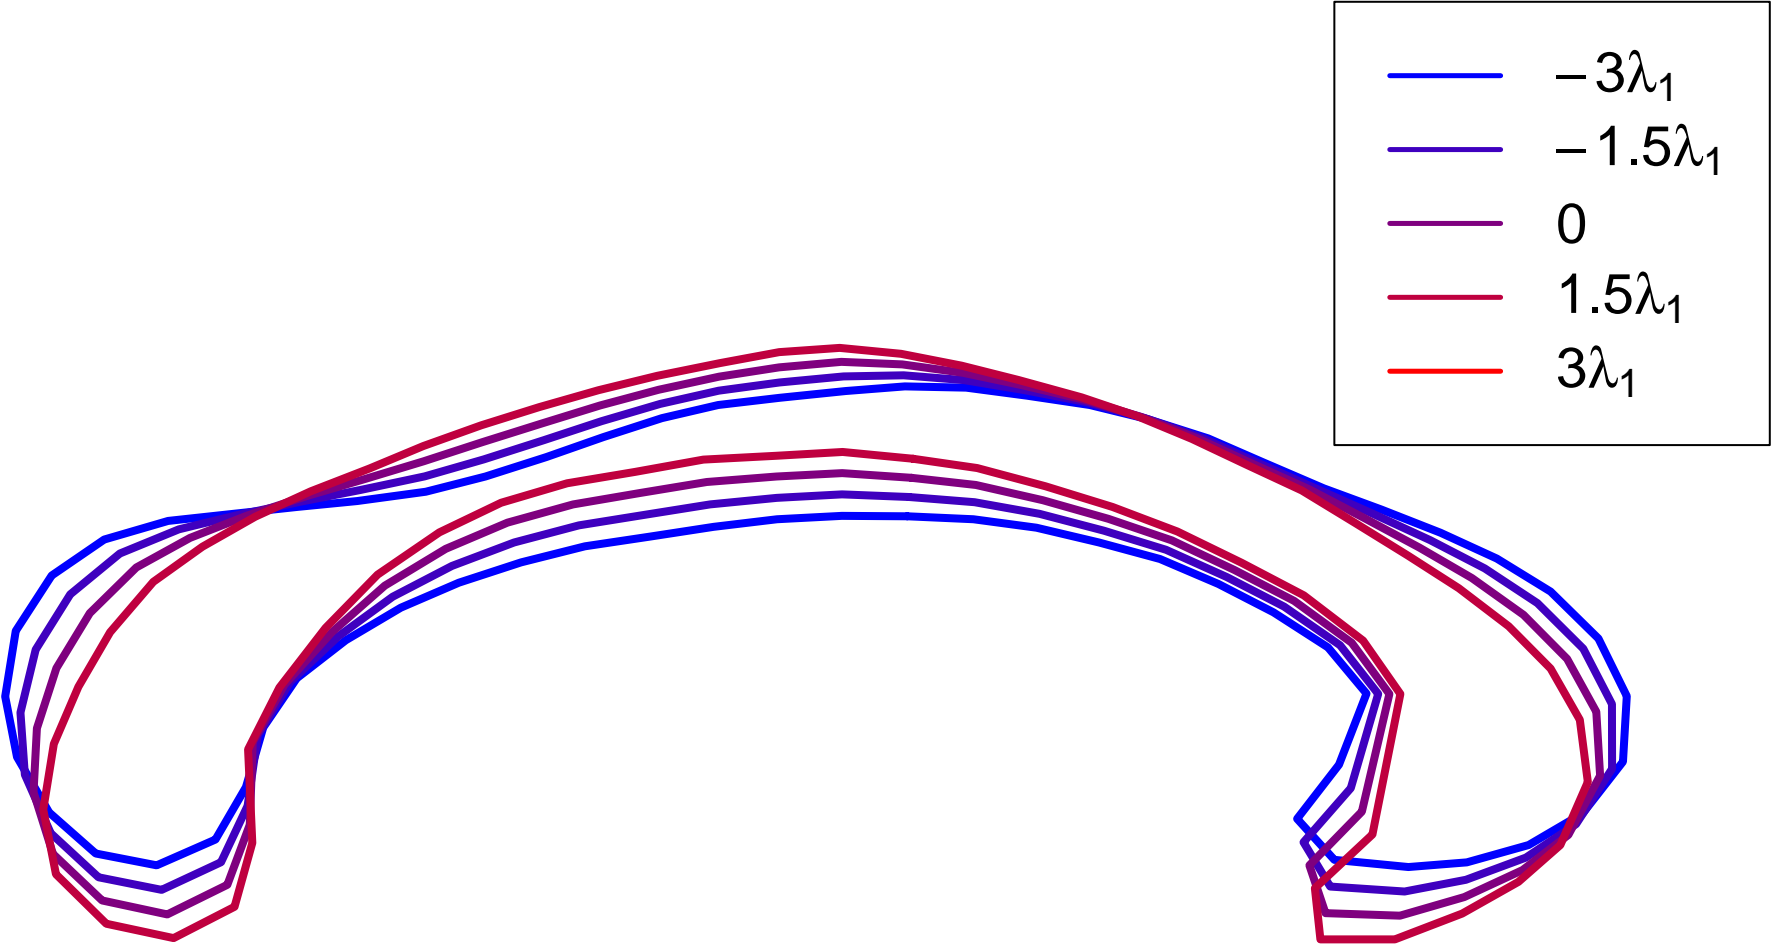

Supplement: Supplementary file 2 [file eb6fdc36b281b7d5eabf33396c2683a2-Supplemental.zip]

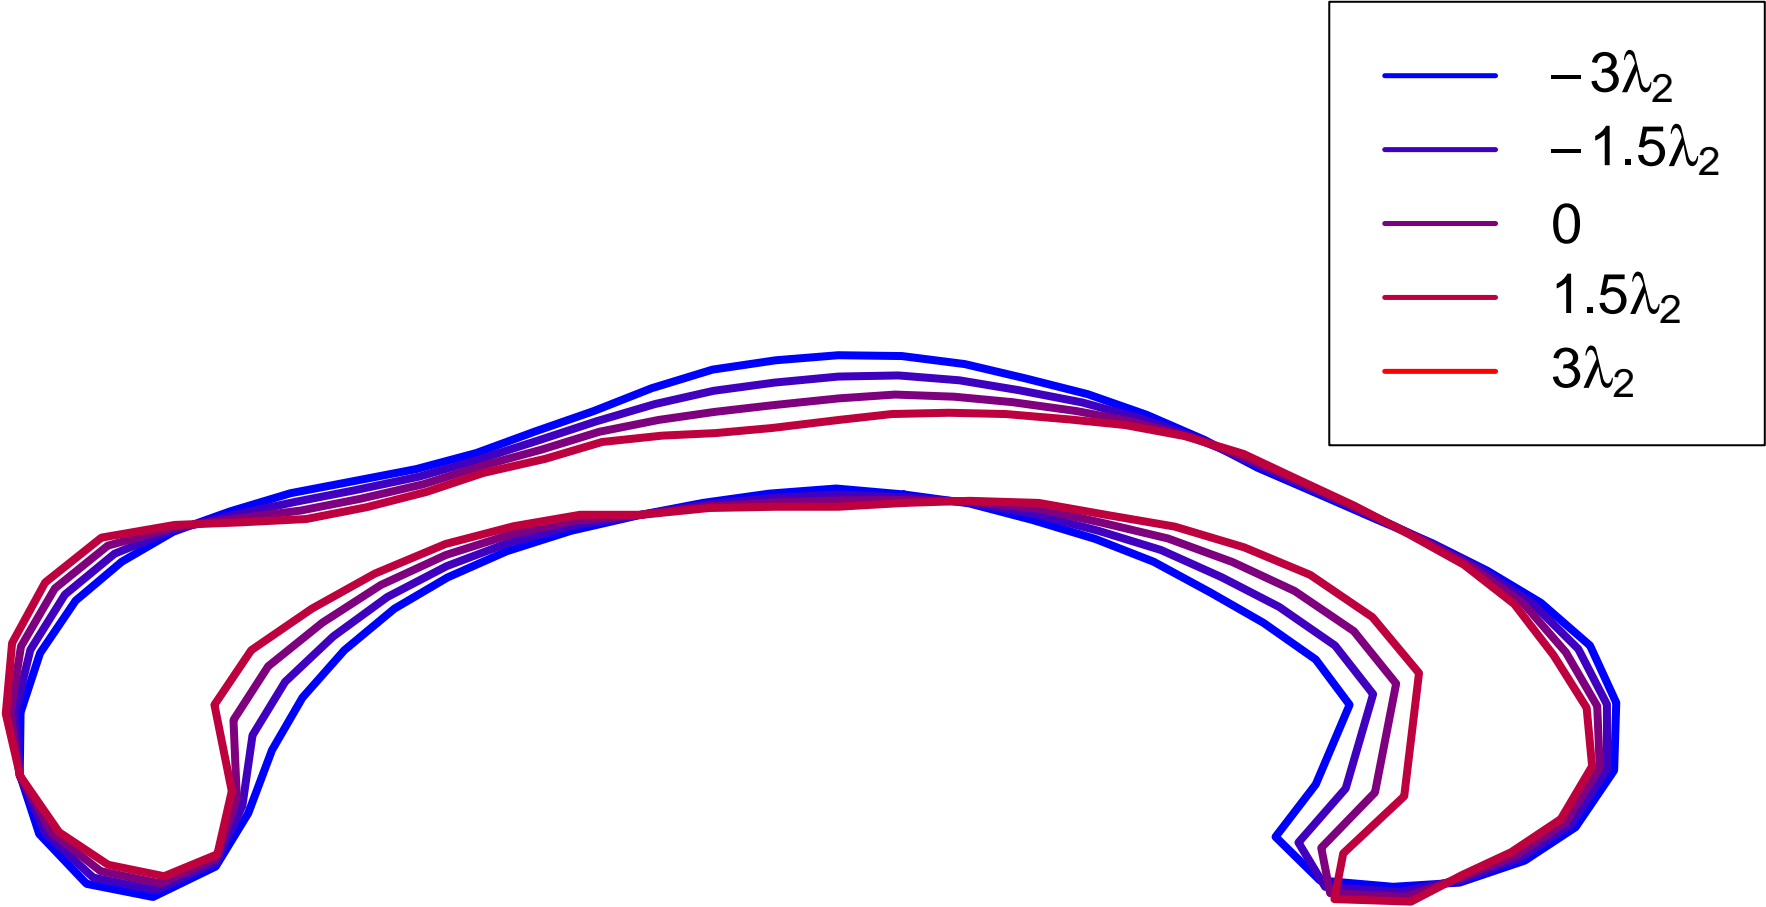

Supplement: Supplementary file 3 [file eb6fdc36b281b7d5eabf33396c2683a2-Supplemental.zip]
